# Supplementary material
Source: PubMed Central journal article supplement (PMC4472455)

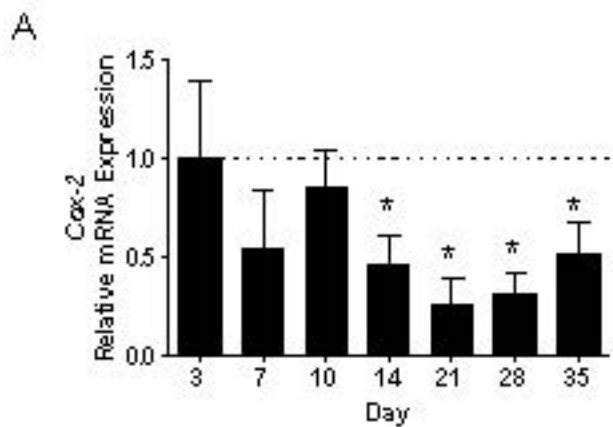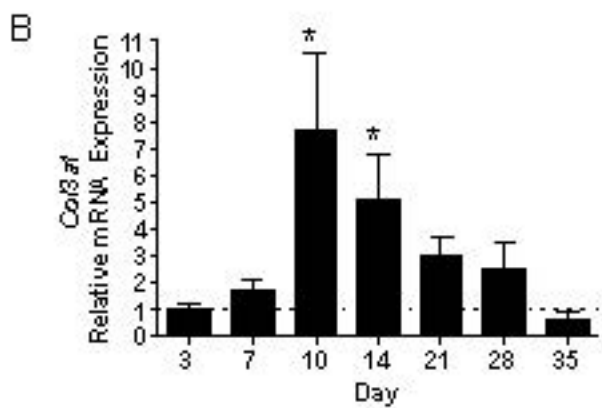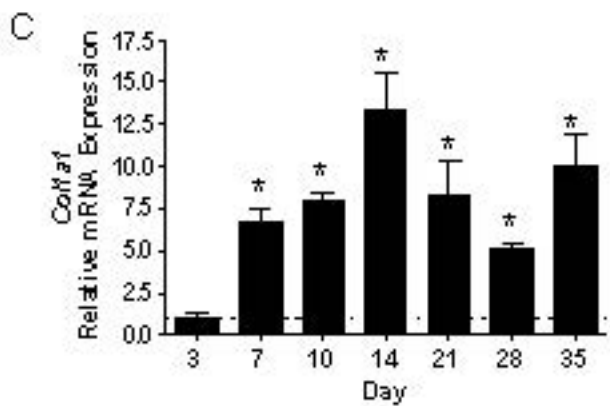

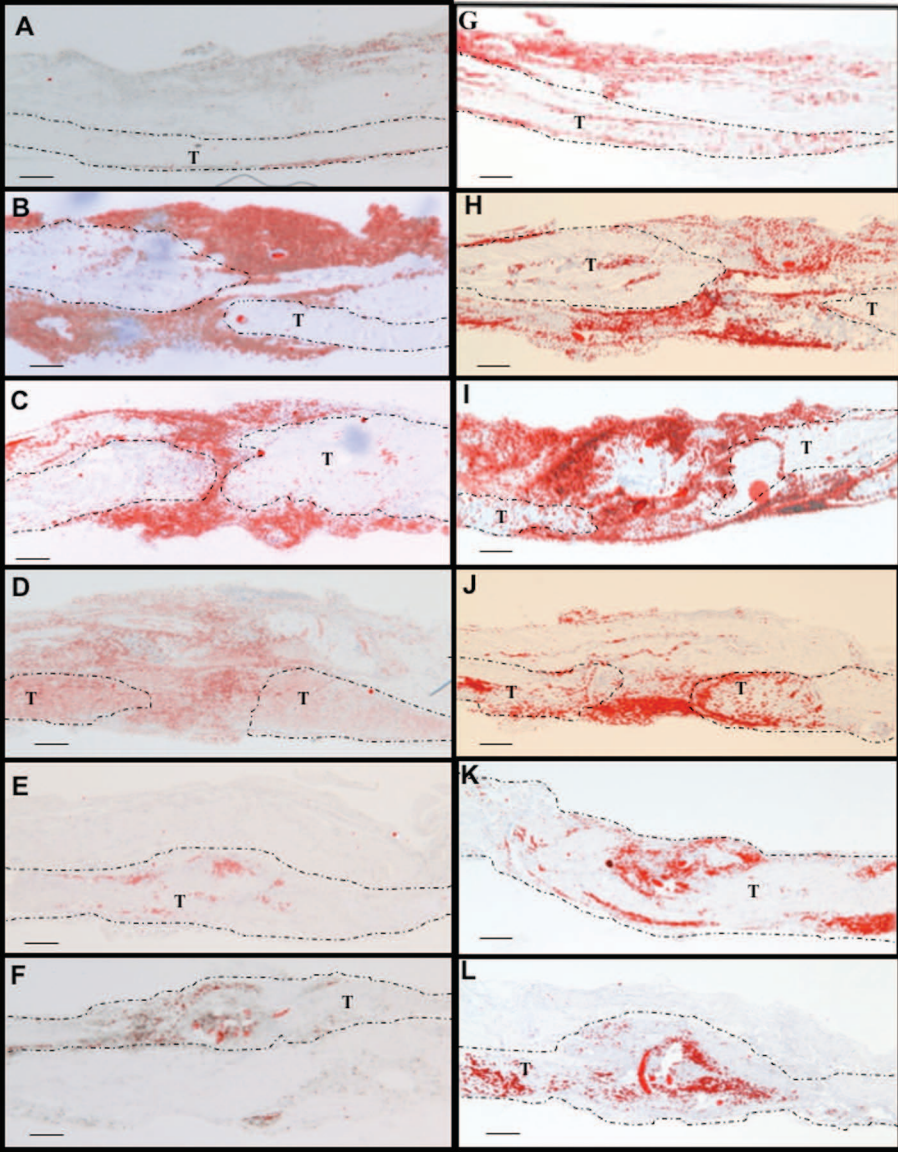

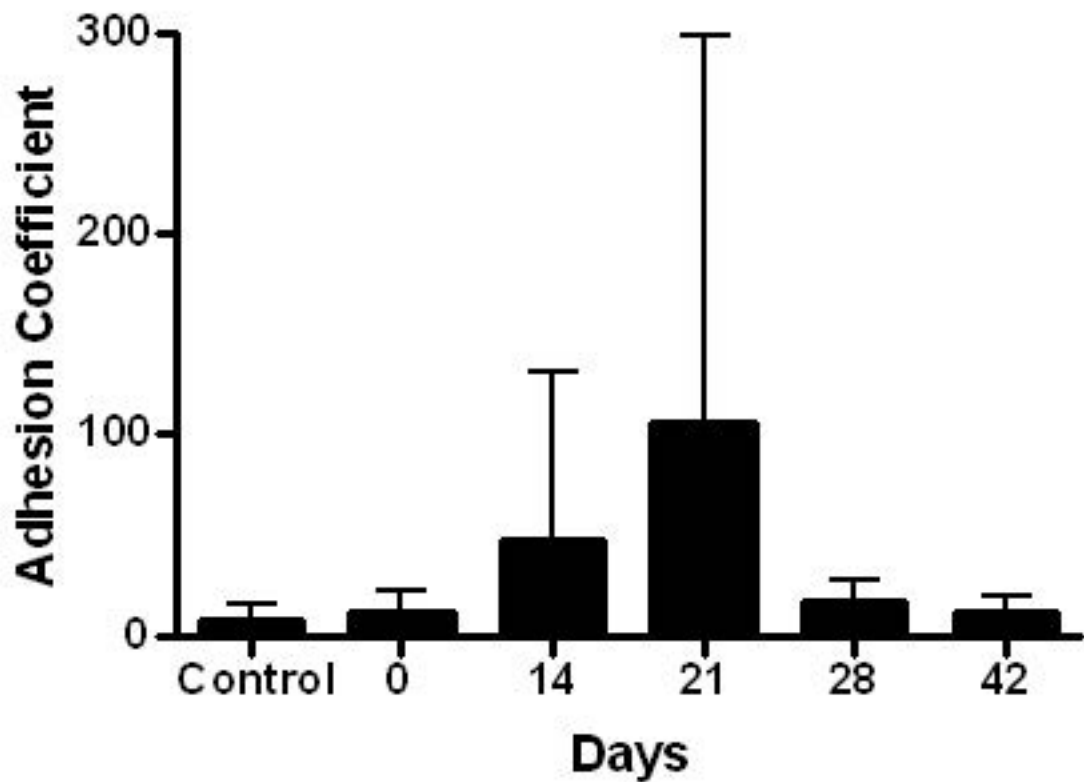

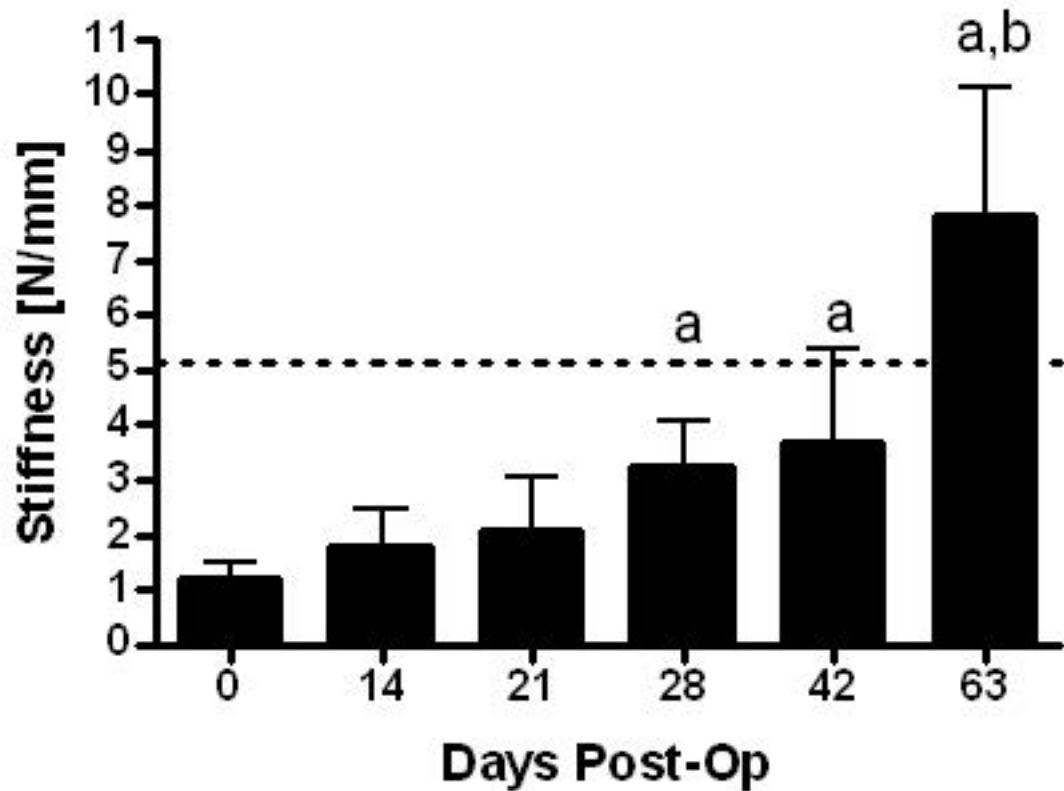

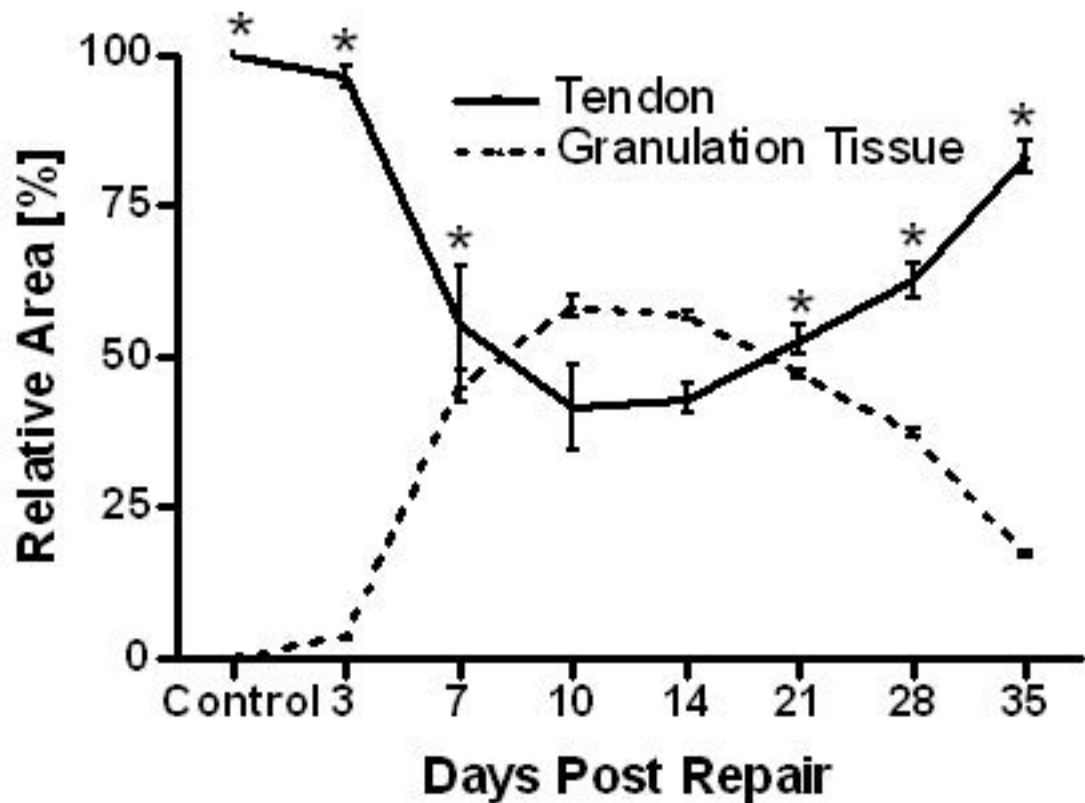

Supplement: NIHMS697455-supplement-Supp_Data.pdf [file NIHMS697455-supplement-Supp_Data.pdf]
